# Supplementary material
Source: PubMed Central journal article supplement (PMC3889748)
Supplement: JCM.01271-13_zjm999092896so1.pdf [file JCM.01271-13_zjm999092896so1.pdf]

**TABLE S1** MIRU-VNTR typing of *Mycobacterium bovis* SB0121 isolates (n = 115) from the random panel using nine loci and three combinations of loci.

| ID <sup>a</sup>                  | MIRU-VNTR loci <sup>b</sup> |       |                |       |        |        |        |                |              | MV type (9 loci) <sup>c</sup> | MV type (6 loci) <sup>d</sup> | MV type (4 loci) <sup>e</sup> | Animal origin |
|----------------------------------|-----------------------------|-------|----------------|-------|--------|--------|--------|----------------|--------------|-------------------------------|-------------------------------|-------------------------------|---------------|
|                                  | ETR-A                       | ETR-B | ETR-D          | ETR-E | MIRU26 | QUB11a | QUB11b | QUB26          | QUB3232short |                               |                               |                               |               |
|                                  | 2165                        | 2461  | 580            | 3192  | 2996   | 2163a  | 2163b  | 4052           | 3232         |                               |                               |                               |               |
| <i>M. bovis</i> BCG <sup>f</sup> | 5                           | 5     | 2 <sup>g</sup> | 3     | 5      | 10     | 3      | 5              | 5            | -                             | -                             | -                             | -             |
| MI05/00611 <sup>h</sup>          | 6                           | 4     | 3              | 3     | 5      | 10     | 2      | 5              | 7            | 1A                            | 1A                            | 1                             | cattle        |
| MI06/00833                       | 6                           | 4     | 3              | 3     | 5      | 10     | 2      | 5              | 7            | 1A                            | 1A                            | 1                             | cattle        |
| MI07/00008 <sup>7</sup>          | 6                           | 4     | 3              | 3     | 5      | 10     | 2      | 5              | 7            | 1A                            | 1A                            | 1                             | cattle        |
| MI08/03982 <sup>7</sup>          | 6                           | 4     | 3              | 3     | 5      | 10     | 2      | 5              | 7            | 1A                            | 1A                            | 1                             | cattle        |
| MI07/10158 <sup>3</sup>          | 6                           | 4     | 3              | 3     | 5      | 10     | 2      | 5              | 7            | 1A                            | 1A                            | 1                             | cattle        |
| MI07/10206 <sup>3</sup>          | 6                           | 4     | 3              | 3     | 5      | 10     | 2      | 5              | 7            | 1A                            | 1A                            | 1                             | cattle        |
| MI07/10142                       | 6                           | 4     | 3              | 3     | 5      | 10     | 2      | 5              | 7            | 1A                            | 1A                            | 1                             | cattle        |
| MI07/10213                       | 6                           | 4     | 3              | 3     | 5      | 10     | 2      | 5              | 7            | 1A                            | 1A                            | 1                             | cattle        |
| MI07/14002                       | 6                           | 4     | 3              | 3     | 5      | 10     | 2      | 5              | 7            | 1A                            | 1A                            | 1                             | cattle        |
| MI06/01507 <sup>6</sup>          | 6                           | 4     | 3              | 3     | 2      | 10     | 2      | 5              | 7            | 1B                            | 1B                            | 1                             | cattle        |
| MI08/00019 <sup>6</sup>          | 6                           | 4     | 3              | 3     | 2      | 10     | 2      | 5              | 7            | 1B                            | 1B                            | 1                             | cattle        |
| MI07/16345 <sup>1</sup>          | 6                           | 4     | 3              | 3     | 5      | 10     | 2      | 3              | 7            | 1C                            | 1C                            | 1                             | cattle        |
| MI08/00936 <sup>1</sup>          | 6                           | 4     | 3              | 3     | 5      | 10     | 2      | 3              | 7            | 1C                            | 1C                            | 1                             | cattle        |
| MI08/06952-1                     | 6                           | 4     | 3              | 3     | 5      | 10     | 2      | N <sup>i</sup> | 7            | -                             | -                             | 1                             | goat          |
| MI07/03539                       | 6                           | 4     | 3              | 3     | 2      | 10     | 1      | 2              | 7            | 1D                            | 1D                            | 1                             | cattle        |
| 02/0439 <sup>10</sup>            | 6                           | 4     | 3              | 3     | 2      | 10     | 2      | 2              | 7            | 1E                            | 1D                            | 1                             | wild boar     |
| 98/0619 <sup>9</sup>             | 5                           | 4     | 3              | 3     | 5      | 10     | 2      | 5              | 8            | 2A                            | 2A                            | 2                             | cattle        |
| 98/0620 <sup>9</sup>             | 5                           | 4     | 3              | 3     | 5      | 10     | 2      | 5              | 8            | 2A                            | 2A                            | 2                             | cattle        |
| 99/0144                          | 5                           | 4     | 3              | 3     | 5      | 10     | 2      | 5              | 8            | 2A                            | 2A                            | 2                             | cattle        |
| MI06/02508                       | 5                           | 4     | 3              | 3     | 5      | 10     | 2      | 5              | 8            | 2A                            | 2A                            | 2                             | cattle        |
| MI07/01089                       | 5                           | 4     | 3              | 3     | 5      | 10     | 2      | 5              | 8            | 2A                            | 2A                            | 2                             | cattle        |
| MI07/11268                       | 5                           | 4     | 3              | 3     | 4      | 10     | 2      | 5              | 8            | 2B                            | 2B                            | 2                             | cattle        |
| MI07/00704                       | 5                           | 4     | 3              | 3     | 5      | 10     | 2      | 4              | 8            | 2C                            | 2C                            | 2                             | cattle        |
| MI06/00001 <sup>h</sup>          | 5                           | 4     | 3              | 3     | 6      | 10     | 2      | 5              | 8            | 2D                            | 2D                            | 2                             | cattle        |
| 03/0549                          | 4                           | 4     | 3              | 3     | 5      | 10     | 2      | 5              | 8            | 3                             | 3                             | 3                             | cattle        |
| MI07/08592                       | 4                           | 4     | 3              | 3     | 5      | 10     | 2      | 5              | 8            | 3                             | 3                             | 3                             | cattle        |
| MI07/11655                       | 4                           | 4     | 3              | 3     | 5      | 10     | 2      | 5              | 8            | 3                             | 3                             | 3                             | cattle        |
| MI08/06714                       | 4                           | 4     | 3              | 3     | 5      | 10     | 2      | 5              | 8            | 3                             | 3                             | 3                             | cattle        |
| MI08/06728                       | 4                           | 4     | 3              | 3     | 5      | 10     | 2      | 5              | 8            | 3                             | 3                             | 3                             | cattle        |

|                          |   |   |   |   |   |    |   |   |    |    |    |    |             |
|--------------------------|---|---|---|---|---|----|---|---|----|----|----|----|-------------|
| MI08/11685               | 4 | 4 | 3 | 3 | 5 | 10 | 2 | 5 | 8  | 3  | 3  | 3  | wild boar   |
| MI05/04376               | 6 | 4 | 3 | 3 | 5 | 10 | 2 | 5 | 8  | 4A | 4A | 4  | cattle      |
| MI06/00214 <sup>14</sup> | 6 | 4 | 3 | 3 | 5 | 10 | 2 | 5 | 8  | 4A | 4A | 4  | cattle      |
| MI06/07842               | 6 | 4 | 3 | 3 | 5 | 10 | 2 | 5 | 8  | 4A | 4A | 4  | cattle      |
| MI07/01798-2             | 6 | 4 | 3 | 3 | 4 | 10 | 2 | 3 | 8  | 4B | 4B | 4  | goat        |
| MI07/04849               | 6 | 4 | 3 | 3 | 4 | 10 | 2 | 3 | 8  | 4B | 4B | 4  | cattle      |
| MI05/02585               | 6 | 4 | 3 | 3 | 5 | 10 | 2 | 3 | 8  | 4C | 4C | 4  | cattle      |
| 04/1602                  | 5 | 2 | 3 | 3 | 5 | 7  | 2 | 5 | 6  | 5A | 5  | 5  | cattle      |
| MI06/05500               | 5 | 2 | 3 | 3 | 5 | 7  | 2 | 5 | 6  | 5A | 5  | 5  | cattle      |
| MI07/04842               | 5 | 2 | 3 | 3 | 5 | 7  | 2 | 5 | 6  | 5A | 5  | 5  | cattle      |
| MI07/08681               | 5 | 2 | 3 | 3 | 5 | 7  | 2 | 5 | 6  | 5A | 5  | 5  | cattle      |
| MI07/11265               | 5 | 2 | 2 | 3 | 5 | 7  | 2 | 5 | 6  | 5B | 5  | 5  | cattle      |
| MI05/00804               | 5 | 4 | 3 | 3 | 5 | 10 | 2 | 5 | 7  | 6A | 6A | 6  | cattle      |
| 04/1048                  | 5 | 4 | 3 | 3 | 5 | 10 | 2 | 5 | 7  | 6A | 6A | 6  | cattle      |
| MI07/12798               | 5 | 4 | 3 | 3 | 5 | 10 | 2 | 5 | 7  | 6A | 6A | 6  | cattle      |
| MI06/05151               | 5 | 4 | 3 | 3 | 6 | 10 | 2 | 5 | 7  | 6B | 6B | 6  | wild boar   |
| DICM08/00669-3           | 5 | 4 | 3 | 3 | 6 | 10 | 2 | 5 | 7  | 6B | 6B | 6  | wild boar   |
| MI05/02380               | 6 | 5 | 3 | 3 | 5 | 10 | 2 | 5 | 10 | 7A | 7A | 7  | cattle      |
| MI06/05819               | 6 | 5 | 3 | 3 | 5 | 10 | 2 | 5 | 10 | 7A | 7A | 7  | cattle      |
| MI07/10177 <sup>4</sup>  | 6 | 5 | 3 | 3 | 5 | 10 | 2 | 5 | 10 | 7A | 7A | 7  | cattle      |
| MI07/16293 <sup>4</sup>  | 6 | 5 | 3 | 3 | 5 | 10 | 2 | 5 | 10 | 7A | 7A | 7  | cattle      |
| 98/0502                  | 6 | 5 | 3 | 3 | 5 | 10 | 2 | 3 | 10 | 7B | 7B | 7  | cattle      |
| 03/0098                  | 4 | 2 | 2 | 3 | 5 | 10 | 2 | 5 | 6  | 8A | 8  | 8  | cattle      |
| MI06/00238               | 4 | 2 | 2 | 3 | 5 | 10 | 2 | 5 | 6  | 8A | 8  | 8  | cattle      |
| 04/0265                  | 4 | 2 | 3 | 3 | 5 | 10 | 2 | 5 | 6  | 8B | 8  | 8  | cattle      |
| MI08/12888               | 5 | 3 | 3 | 3 | 5 | 10 | 2 | 5 | 7  | 9  | 9  | 9  | red deer    |
| MI08/04144               | 5 | 3 | 3 | 3 | 5 | 10 | 2 | 5 | 7  | 9  | 9  | 9  | fallow deer |
| MI05/00319 <sup>2</sup>  | 5 | 3 | 3 | 3 | 5 | 9  | 2 | 5 | 6  | 10 | 10 | 10 | cattle      |
| MI05/00323 <sup>2</sup>  | 5 | 3 | 3 | 3 | 5 | 9  | 2 | 5 | 6  | 10 | 10 | 10 | cattle      |
| MI07/16333 <sup>13</sup> | 5 | 4 | 3 | 3 | 5 | 10 | 2 | 5 | 10 | 11 | 11 | 11 | cattle      |
| MI07/01170               | 5 | 4 | 4 | N | 5 | 10 | 2 | 5 | 10 | -  | 11 | 11 | cattle      |
| 97/0024                  | 5 | 4 | 3 | 3 | 5 | 7  | 2 | 5 | 7  | 12 | 12 | 12 | cattle      |
| MI08/06282               | 5 | 4 | 3 | 3 | 5 | 7  | 2 | 5 | 7  | 12 | 12 | 12 | cattle      |
| MI07/06633 <sup>8</sup>  | 6 | 3 | 3 | 3 | 5 | 10 | 2 | 4 | 7  | 13 | 13 | 13 | cattle      |

|                          |   |   |   |   |   |    |   |   |    |     |     |    |             |
|--------------------------|---|---|---|---|---|----|---|---|----|-----|-----|----|-------------|
| MI07/11354 <sup>8</sup>  | 6 | 3 | 3 | 3 | 5 | 10 | 2 | 4 | 7  | 13  | 13  | 13 | cattle      |
| MI06/00216 <sup>14</sup> | 6 | 4 | 3 | 3 | 5 | 10 | 2 | 5 | 6  | 14  | 14  | 14 | cattle      |
| MI07/08629               | 6 | 4 | 3 | 3 | 5 | 10 | 2 | 5 | 6  | 14  | 14  | 14 | cattle      |
| MI10/07686               | 5 | 4 | 4 | 3 | 5 | 10 | 2 | 5 | 9  | 15A | 15A | 15 | pig         |
| DICM08/01277-10B         | 5 | 4 | 4 | 3 | 5 | 10 | 2 | 7 | 9  | 15B | 15B | 15 | red deer    |
| 99/0281                  | 5 | 4 | 3 | 3 | 5 | 5  | 2 | 6 | 5  | 16A | 16A | 16 | cattle      |
| MI06/07005               | 5 | 4 | 3 | 3 | 4 | 5  | 2 | 5 | 5  | 16B | 16B | 16 | cattle      |
| 00/00178T                | 6 | 4 | 3 | 3 | 2 | 10 | 2 | 5 | 10 | 17A | 17A | 17 | cattle      |
| MI05/00841               | 6 | 4 | 3 | 3 | 5 | 10 | 2 | 5 | 10 | 17B | 17B | 17 | cattle      |
| MI07/06666               | 6 | 4 | 3 | 3 | 2 | 10 | 2 | 5 | 9  | 18A | 18A | 18 | cattle      |
| MI09/04329               | 6 | 4 | 3 | 3 | 5 | 10 | 2 | 5 | 9  | 18B | 18B | 18 | wild boar   |
| MI06/05481 <sup>11</sup> | 3 | 3 | 3 | 3 | 5 | 10 | 2 | 5 | 9  | 19  | 19  | 19 | cattle      |
| MI06/05469 <sup>11</sup> | 3 | 3 | 3 | 3 | 5 | 10 | 2 | 5 | 9  | 19  | 19  | 19 | cattle      |
| 00/0197                  | 1 | 3 | 3 | 3 | 5 | 10 | 2 | 5 | 8  | 20  | 20  | 20 | cattle      |
| MI06/05041               | 3 | 2 | 3 | 3 | 5 | 7  | 2 | 5 | 6  | 21  | 21  | 21 | cattle      |
| MI07/12732               | 4 | 3 | 2 | 3 | 5 | 15 | 2 | 5 | 7  | 22  | 22  | 22 | cattle      |
| MI07/11662               | 4 | 4 | 3 | 3 | 5 | 10 | 2 | 5 | 9  | 23  | 23  | 23 | cattle      |
| 02/0440 <sup>10</sup>    | 5 | 3 | 3 | 3 | 5 | 10 | 2 | 5 | 10 | 24  | 24  | 24 | wild boar   |
| 98/0144                  | 5 | 3 | 3 | 3 | 5 | 10 | 2 | 5 | 6  | 25  | 25  | 25 | cattle      |
| MI07/08732               | 5 | 3 | 3 | 3 | 5 | 10 | 2 | 5 | 8  | 26  | 26  | 26 | cattle      |
| MI05/01528               | 5 | 3 | 3 | 3 | 5 | 9  | 2 | 5 | 7  | 27  | 27  | 27 | cattle      |
| 98/0679 <sup>15</sup>    | 5 | 5 | 3 | 2 | 5 | 10 | 2 | 5 | 8  | 28  | 28  | 28 | cattle      |
| MI06/00126               | 5 | 4 | 3 | 3 | 5 | 10 | 2 | 5 | 15 | 29  | 29  | 29 | cattle      |
| 99/0095 <sup>5</sup>     | 5 | 4 | 3 | 3 | 5 | 10 | 2 | 5 | 4  | 30  | 30  | 30 | cattle      |
| MI10/06535               | 5 | 4 | 3 | 3 | 5 | 10 | 3 | 6 | 6  | 31  | 31  | 31 | pig         |
| MI06/06077               | 5 | 4 | 3 | 3 | 5 | 7  | 2 | 5 | 8  | 32  | 32  | 32 | cattle      |
| MI05/04423 <sup>12</sup> | 5 | 4 | 3 | 3 | 5 | 9  | 1 | 5 | 11 | 33  | 33  | 33 | cattle      |
| MI10/08243               | 5 | 4 | 3 | 3 | 5 | 9  | 2 | 5 | 8  | 34  | 34  | 34 | fallow deer |
| MI08/00955 <sup>13</sup> | 5 | 4 | 3 | 3 | 6 | 12 | 2 | 4 | 6  | 35  | 35  | 35 | cattle      |
| MI05/04048               | 5 | 4 | 4 | 3 | 5 | 10 | 2 | 5 | 5  | 36  | 36  | 36 | cattle      |
| MI06/02387               | 5 | 5 | 3 | 3 | 5 | 10 | 2 | 5 | 6  | 37  | 37  | 37 | cattle      |
| MI08/06294               | 5 | 6 | 3 | 3 | 5 | 10 | 2 | 5 | 11 | 38  | 38  | 38 | cattle      |
| 99/0254                  | 6 | 3 | 3 | 3 | 5 | 9  | 2 | 5 | 5  | 39  | 39  | 39 | cattle      |
| MI06/06841               | 6 | 4 | 2 | 2 | 5 | 10 | 2 | 4 | 5  | 40  | 40  | 40 | cattle      |

|                          |     |     |   |   |     |    |   |     |    |    |    |    |           |
|--------------------------|-----|-----|---|---|-----|----|---|-----|----|----|----|----|-----------|
| MI07/03947               | 6   | 5   | 3 | 2 | 4   | 10 | 2 | 5   | 8  | 41 | 41 | 41 | cattle    |
| MI05/00703               | 6   | 4   | 3 | 3 | 5   | 10 | 2 | 5   | 11 | 42 | 42 | 42 | cattle    |
| MI07/08688               | 6   | 4   | 3 | 3 | 6   | 11 | 2 | 4   | 14 | 43 | 43 | 43 | cattle    |
| MI05/00050 <sup>h</sup>  | 6   | 4   | 3 | 3 | 6   | 12 | 2 | 4   | 12 | 44 | 44 | 44 | wild boar |
| MI08/00951               | 6   | 4   | 3 | 3 | 6   | 12 | 2 | 4   | 13 | 45 | 45 | 45 | cattle    |
| 98/0686 <sup>15</sup>    | 6   | 4   | 3 | 3 | 6   | 13 | 2 | 4   | 14 | 46 | 46 | 46 | cattle    |
| MI06/07218               | 6   | 5   | 3 | 2 | 5   | 10 | 2 | 5   | 9  | 47 | 47 | 47 | cattle    |
| MI06/07031               | 8   | 5   | 3 | 3 | 5   | 10 | 2 | 5   | 7  | 48 | 48 | 48 | cattle    |
| MI07/00701               | 5   | 3   | 4 | 3 | 5   | 7  | N | 5   | 11 | -  | 49 | 49 | cattle    |
| MI07/11175               | 6   | 4   | 3 | N | 5   | 8  | 2 | 4   | 8  | -  | 50 | 50 | cattle    |
| MI08/02787               | 7   | 4   | 2 | N | 5   | 6  | 1 | 5   | 11 | -  | 51 | 51 | cattle    |
| MI08/11986               | 6   | 4   | 3 | 3 | 4/5 | 4  | N | 2/5 | 7  | -  | -  | 52 | badger    |
| 99/0098 <sup>5</sup>     | 5   | 4   | 3 | 3 | 5   | N  | 2 | 5   | 4  | -  | -  | -  | cattle    |
| MI05/04378 <sup>12</sup> | 12  | 5   | 3 | 3 | 4   | N  | 2 | 4   | 8  | -  | -  | -  | cattle    |
| MI07/03936               | 4/5 | 3   | 3 | N | 5   | 10 | 2 | 5   | 8  | -  | -  | -  | cattle    |
| MI07/04598               | 5   | 3/4 | 3 | N | N   | N  | 2 | 4/5 | 7  | -  | -  | -  | cattle    |
| MI07/11661               | 5   | 4   | 3 | 3 | 5   | N  | 2 | 5   | 5  | -  | -  | -  | cattle    |
| MI10/05128               | N   | 4   | 3 | 3 | N   | N  | 2 | N   | 8  | -  | -  | -  | badger    |

<sup>a</sup> Isolate reference.

<sup>b</sup> MIRU-VNTR loci with corresponding alias.

<sup>c</sup> MIRU-VNTR types obtained with the nine-loci approach including ETR-A, ETR-B, ETR-D, ETR-E, MIRU26, QUB11a, QUB11b, QUB26 and QUB3232.

<sup>d</sup> MIRU-VNTR types obtained with the six-loci approach including ETR-A, ETR-B, MIRU26, QUB11a, QUB26 and QUB3232.

<sup>e</sup> MIRU-VNTR types obtained with the four-loci approach including ETR-A, ETR-B, QUB11a and QUB3232. Table is arranged according to the number of isolates with each type in descending order.

<sup>f</sup> *Mycobacterium bovis* BCG Danish (CCUG 27863, Culture Collection, University of Göteborg, Sweden) included as positive control in all MIRU-VNTR assays.

<sup>g</sup> *M. bovis* BCG and approximately 1% of *M. tuberculosis* strains lack the partial repeat of 53 bp at MIRU-VNTR locus ETR-D; in these cases the number of repeats is expressed as prime (').

<sup>h</sup> Strains used for DNA microarray analysis.

<sup>i</sup> Not amplifiable.

<sup>1-15</sup> Pairs of related isolates from the same farm or hunting estate.

**TABLE S2** Deletions common to the three *Mycobacterium bovis* strains MI05/00611, MI06/00001 and MI05/00050 identified by DNA microarray using composite microarrays representing all the genes in the reference genomes *M. bovis* AF2122/97, *M. tuberculosis* H37Rv and CDC1551.

| Reference genome               | Common gene name | Synonym                                     | Function <sup>a</sup>                                                                                                                                                               |
|--------------------------------|------------------|---------------------------------------------|-------------------------------------------------------------------------------------------------------------------------------------------------------------------------------------|
| <i>M. tuberculosis</i> CDC1551 | MT1560           | MT1560                                      | Hypothetical protein (2).                                                                                                                                                           |
| <i>M. tuberculosis</i> H37Rv   | Rv0796           | Rv0796;Rv0796 (9B6)                         | Required for the transposition of the insertion element IS6110. Found to be deleted (partially or completely) in one or more clinical isolates of <i>M. tuberculosis</i> H37Rv (9). |
| <i>M. tuberculosis</i> H37Rv   | Rv1369c          | Rv1369c;Rv1369c (5J1)                       | Possibly required for the transposition of the insertion element IS6110. Identical to many other <i>M. tuberculosis</i> IS6110 transposase subunits (6,8).                          |
| <i>M. tuberculosis</i> H37Rv   | Rv1756c          | Rv1756c;MT1803;Rv1756c (9J5)                | Required for the transposition of the insertion element IS6110. Identical to many other <i>M. tuberculosis</i> IS6110 transposase subunits (6,8,9).                                 |
| <i>M. tuberculosis</i> H37Rv   | Rv1764           | Rv1764;Rv1764 (9O5)                         | Required for the transposition of the insertion element IS6110. Identical to many other <i>M. tuberculosis</i> IS6110 transposase subunits (6,8,9).                                 |
| <i>M. tuberculosis</i> H37Rv   | Rv2167c          | Rv2167c;Rv2167c (9C16)                      | Possibly required for the transposition of the insertion element IS6110. Identical to many other <i>M. tuberculosis</i> IS6110 transposase subunits (6,8).                          |
| <i>M. tuberculosis</i> H37Rv   | Rv3185           | Rv3185;Rv3185 (10J10)                       | Involved in the transposition in the insertion sequence IS6110. Identical to many other <i>M. tuberculosis</i> IS6110 transposase subunits (1,6,8,9).                               |
| <i>M. tuberculosis</i> H37Rv   | Rv3187           | Rv3187;Rv3187 (10L10)                       | Involved in the transposition in the insertion sequence IS6110. Identical to many other <i>M. tuberculosis</i> IS6110 transposase subunits (1,6,8,9).                               |
| <i>M. tuberculosis</i> H37Rv   | PPE54            | Rv3343c;Mb3375c;MT3447;PPE54;PPE;PPE (9B20) | Function unknown. Member of the <i>M. tuberculosis</i> PPE family (3,4,7).                                                                                                          |
| <i>M. tuberculosis</i> H37Rv   | Rv3380c          | Rv3380c;Rv3380c (9C22)                      | Possibly required for the transposition of the insertion element IS6110. Identical to many other <i>M. tuberculosis</i> IS6110 transposase subunits (6,8).                          |

<sup>a</sup> For reference genome *M. tuberculosis* H37Rv according to Tuberculist <http://tuberculist.epfl.ch/index.html> (5).

#### References:

1. Becq J, Gutierrez MC, Rosas-Magallanes V, Rauzier J, Gicquel B, Neyrolles O, Deschavanne P. 2007. Contribution of horizontally acquired genomic islands to the evolution of the tubercle bacilli. *Mol. Biol. Evol.* 24:1861-1871.

2. Fleischmann RD, Alland D, Eisen JA, Carpenter L, White O, Peterson J, DeBoy R, Dodson R, Gwinn M, Haft D, Hickey E, Kolonay JF, Nelson WC, Umayam LA, Ermolaeva M, Salzberg SL, Delcher A, Utterback T, Weidman J, Khouri H, Gill J, Mikula A, Bishai W, Jacobs JW Jr., Venter JC, Fraser CM. 2002. Whole-genome comparison of *Mycobacterium tuberculosis* clinical and laboratory strains. *J. Bacteriol.* 184:5479-5490.
3. Griffin JE, Gawronski D, Dejesus MA, Ioerger TR, Akerley BJ, Sassetti CM. 2011. High-resolution phenotypic profiling defines genes essential for mycobacterial growth and cholesterol catabolism. *PLoS Pathog* 7:e1002251.
4. Kruh NA, Troudt J, Izzo A, Prenni J, Dobos KM. 2010. Portrait of a pathogen: the *Mycobacterium tuberculosis* proteome in vivo. *PLoS One* 5:e13938.
5. Lew JM, Kapopoulou A, Jones LM, Cole ST. 2011. TubercuList-10 years after. *Tuberculosis (Edinb. )* 91:1-7.
6. McAdam RA, Hermans PW, van Soolingen D, Zainuddin ZF, Catty D, van Embden JDA, Dale JW. 1990. Characterization of a *Mycobacterium tuberculosis* insertion sequence belonging to the IS3 family. *Mol. Microbiol.* 4:1607-1613.
7. Sassetti CM, Boyd DH, Rubin EJ. 2003. Genes required for mycobacterial growth defined by high density mutagenesis. *Mol. Microbiol.* 48:77-84.
8. Thierry D, Brisson-Noel A, Vincent-Levy-Frebault V, Nguyen S, Guesdon JL, Gicquel B. 1990. Characterization of a *Mycobacterium tuberculosis* insertion sequence, IS6110, and its application in diagnosis. *J. Clin. Microbiol.* 28:2668-2673.
9. Tsolaki AG, Hirsh AE, DeRiemer K, Enciso JA, Wong MZ, Hannan M, Goguet de la Salmoniere YO, Aman K, Kato-Maeda M, Small PM. 2004. Functional and evolutionary genomics of *Mycobacterium tuberculosis*: insights from genomic deletions in 100 strains. *Proc. Natl. Acad. Sci. U. S. A* 101:4865-4870.
